# Supplementary material for: LC–MS Metabolomic Profiling of Five Types of Unrefined, Cold-Pressed Seed Oils to Identify Markers to Determine Oil Authenticity and to Test for Oil Adulteration
Source: MDPI journal article supplement (doi:10.3390/molecules28124754), 2023-06-14
Supplement: s1 [file s1]

## SUPPLEMENTARY MATERIAL

# LC–MS metabolomic profiling of five types of unrefined, cold-pressed seed oils to identify markers to determine oil authenticity and to test for oil adulteration

Agata Sumara<sup>1</sup>, Anna Stachniuk<sup>1</sup>, Alicja Trzpil<sup>1</sup>, Adrian Bartoszek<sup>1</sup>, Magdalena Montowska<sup>2</sup>,

Emilia Fornal<sup>1\*</sup>

<sup>1</sup> Department of Bioanalytics, Medical University of Lublin, ul. Jaczewskiego 8b, 20-090 Lublin, Poland; agata.sumara@umlub.pl (A.S.); anna.stachniuk@umlub.pl (A.S.); alicja.trzpił@umlub.pl (A.T.); adrian.bartoszek@umlub.pl (A.B.)

<sup>2</sup> Department of Meat Technology, Poznan University of Life Sciences, ul. Wojska Polskiego 31, 60-624 Poznan, Poland; magdalena.montowska@up.poznan.pl

\* Correspondence: emilia.fornal@umlub.pl

Table S1. Preparation of binary oil mixtures

| OIL              | 5%     | 10%    | 30%    | 50%    | 70%    | 90%    |
|------------------|--------|--------|--------|--------|--------|--------|
| Black seed       | 25 µl  | 50 µl  | 150 µl | 250 µl | 350 µl | 450 µl |
| Evening Primrose |        |        |        |        |        |        |
| Hemp             |        |        |        |        |        |        |
| Milk Thistle     |        |        |        |        |        |        |
| Pumpkin          |        |        |        |        |        |        |
|                  |        |        |        |        |        |        |
| Sunflower        | 475 µl | 450 µl | 350 µl | 250 µl | 150 µl | 50 µl  |
| Rapeseed         |        |        |        |        |        |        |
| Sesame           |        |        |        |        |        |        |

Table S2. Differences in the intensity of the oil markers in products from different producers and from different production batches, expressed as relative standard deviation of the peak areas of the extracted ion chromatograms (EIC).

| Oil              | No  | Observe<br><i>m/z</i> | tR<br>[min] | RSD<br>[%] |
|------------------|-----|-----------------------|-------------|------------|
| Black seed       | M1  | 166.1226              | 2.6         | 36.48      |
|                  | M2  | 328.1551              | 4.2         | 90.14      |
|                  | M3  | 342.1710              | 5.1         | 64.15      |
|                  | M4  | 313.1802              | 7.3         | 49.58      |
|                  | M5  | 238.0901              | 7.9         | 90.70      |
|                  | M6  | 131.0862              | 9.7         | 47.15      |
|                  | M7  | 385.2376              | 11.4        | 84.36      |
|                  | M8  | 404.2641              | 13.1        | 128.73     |
|                  | M9  | 677.3231              | 19.1        | 78.66      |
|                  | M10 | 635.3118              | 20.9        | 94.15      |
| Evening Primrose | M1  | 469.3317              | 10.9        | 29.31      |
|                  | M2  | 455.3161              | 11.8        | 30.38      |
|                  | M3  | 409.2207              | 14.4        | 72.38      |
|                  | M4  | 492.3174              | 16.5        | 78.06      |
|                  | M5  | 634.4167              | 20.9        | 90.87      |
|                  | M6  | 720.4547              | 21.1        | 92.00      |
|                  | M7  | 577.39                | 22.9        | 25.71      |
|                  | M8  | 429.3741              | 24.2        | 25.27      |
| Hemp seeds       | M1  | 375.2178              | 13.3        | 59.37      |
|                  | M2  | 369.1343              | 14.4        | 45.96      |
|                  | M3  | 437.1965              | 18.3        | 48.36      |
|                  | M4  | 341.2123              | 18.6        | 55.57      |
|                  | M5  | 315.2329              | 19.3        | 49.80      |
|                  | M6  | 498.3586              | 22.6        | 57.13      |
|                  | M7  | 460.4163              | 28.2        | 65.57      |
| Milk<br>Thistle  | M1  | 145.0764              | 2.1         | 61.21      |
|                  | M2  | 483.1296              | 8.8         | 67.97      |
|                  | M3  | 233.1545              | 11.6        | 68.34      |
|                  | M4  | 239.2013              | 12.1        | 103.14     |
| Pumpkin seed     | M1  | 269.1904              | 8.7         | 54.06      |
|                  | M2  | 181.1231              | 17.9        | 63.41      |
|                  | M3  | 358.2389              | 18.4        | 28.39      |
|                  | M4  | 578.4219              | 19.6        | 14.72      |
|                  | M5  | 697.4592              | 22.1        | 66.81      |
|                  | M6  | 682.4482              | 25.1        | 29.66      |
|                  | M7  | 578.5152              | 28.6        | 50.18      |

Table S3. LOD for sunflower, rapeseed and sesame specific metabolomic markers.

| OIL       |    |          |              | Black seed | Hemp  | Evening Primrose | Milk Thistle | Pumpkin seed |
|-----------|----|----------|--------------|------------|-------|------------------|--------------|--------------|
|           |    |          |              | LOD        | LOD   | LOD              | LOD          | LOD          |
| Sunflower | 1  | 231.1386 | 10.03 ± 0.18 | 25.00      | 3.49  | *                | 25.00        | *            |
|           | 2  | 217.0865 | 11.31 ± 0.25 | 2.91       | 0.38  | 8.11             | 12.00        | 3.49         |
|           | 3  | 345.0975 | 11.77 ± 0.25 | 14.29      | *     | 18.75            | *            | *            |
|           | 4  | 203.1076 | 12.76 ± 0.24 | 3.30       | 0.40  | 0.71             | 2.40         | 0.90         |
|           | 5  | 301.2172 | 13.15 ± 0.2  | 14.29      | 16.67 | 15.79            | 12.00        | 13.04        |
|           | 6  | 392.2444 | 14.14 ± 0.26 | 0.52       | 0.42  | 1.60             | 2.83         | 1.35         |
|           | 7  | 420.2758 | 16.76 ± 0.3  | 9.09       | 0.28  | 0.66             | 3.57         | 4.48         |
|           | 8  | 432.2758 | 17.47 ± 0.28 | 6.52       | 0.52  | 1.60             | 2.83         | 2.04         |
|           | 9  | 434.2913 | 17.98 ± 0.33 | 4.69       | 0.20  | 4.92             | 2.59         | 2.13         |
|           | 10 | 576.3394 | 19.44 ± 0.26 | *          | *     | *                | 21.43        | 25.00        |
|           | 11 | 590.3552 | 20.23 ± 0.31 | 14.29      | 1.96  | 1.62             | 3.80         | 2.63         |
|           | 12 | 604.3699 | 20.97 ± 0.3  | 8.33       | 2.73  | 5.77             | 4.11         | 5.66         |
|           | 13 | 618.3865 | 21.74 ± 0.26 | *          | 0.80  | 7.14             | 8.33         | 8.33         |
| Rapeseed  | 14 | 162.0557 | 6.01 ± 0.28  | 1.29       | 1.23  | 1.66             | 2.17         | 4.55         |
|           | 15 | 225.1488 | 6.44 ± 0.16  | 10.00      | 10.71 | 10.71            | 9.38         | 17.65        |
|           | 16 | 288.1237 | 10.05 ± 0.13 | 1.26       | 0.48  | 5.45             | 3.41         | 5.36         |
|           | 17 | 467.3510 | 20.42 ± 0.3  | *          | 1.09  | 3.37             | 9.09         | 13.04        |
|           | 18 | 483.3824 | 22.01 ± 0.18 | *          | 14.29 | 5.08             | *            | *            |
|           | 19 | 379.3365 | 24.26 ± 0.34 | *          | 0.67  | 16.67            | *            | 14.29        |
|           | 20 | 413.3429 | 24.81 ± 0.34 | 0.68       | 0.15  | 1.68             | 4.35         | 3.30         |
|           | 21 | 773.5184 | 27.95 ± 0.7  | *          | 0.72  | 6.82             | 13.04        | 20.00        |
| Sesame    | 22 | 373.1286 | 8.71 ± 0.15  | 5.66       | 3.49  | 12.00            | 13.64        | 8.57         |
|           | 23 | 371.1136 | 10.6 ± 0.19  | 0.15       | 0.12  | 0.59             | 1.52         | 0.55         |
|           | 24 | 299.2592 | 12.88 ± 0.07 | 0.62       | 0.85  | 1.38             | 4.69         | 2.83         |
|           | 25 | 337.1082 | 13.66 ± 0.22 | 0.23       | 0.11  | 0.63             | 1.01         | 3.09         |
|           | 26 | 173.0604 | 14.53 ± 0.23 | 0.30       | 0.11  | 3.03             | 1.25         | 2.63         |

LOD - Limit of detection; asterix (\*) - value no calculated; metabolomic markers of sunflower, rapeseed and sesame oil were as reported previously by Sumara et al. 2023

Table S4. Composition of the commercial unrefined, cold- pressed oil blends products

| Name              | No.   | Oil composition |                     |                      |               |
|-------------------|-------|-----------------|---------------------|----------------------|---------------|
| Oil for children  | Mix 1 | 98% Flax seed   | 2% Black seed       |                      |               |
| Oil for the heart | Mix 2 | 80% Flax seed   | 20% Black seed      |                      |               |
| Oil for women     | Mix 3 | 70% Flax seed   | 27% Milk thistle    | 3% Evening primrose  |               |
| Oil for mothers   | Mix 4 | 40% Flax seed   | 40% Sunflower       | 20% Evening primrose |               |
| Oil for elderly   | Mix 5 | 40% Flax seed   | 40% Camelina        | 20% Milk Thistle     |               |
| Oil for men       | Mix 6 | 85% Flax seed   | 10% Pumpkin seed    | 5% Hemp              |               |
| Immuno oil        | Mix 7 | 87% Camelina    | 5% Evening primrose | 4% Pumpkin seed      | 4% Black seed |

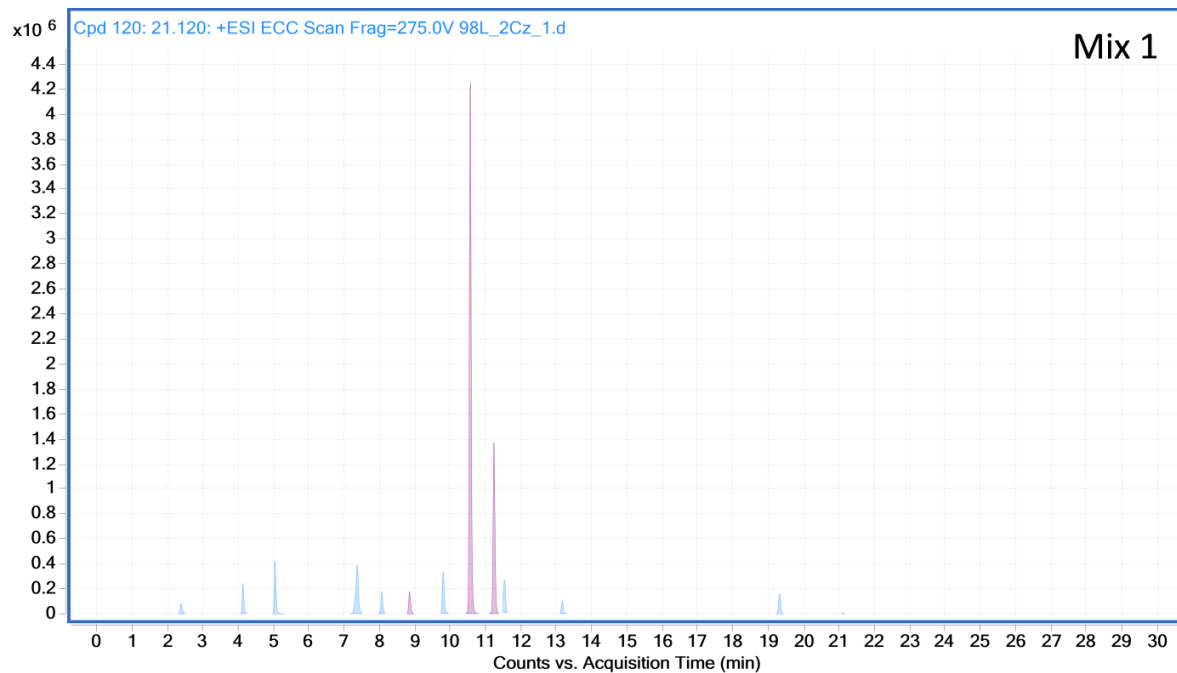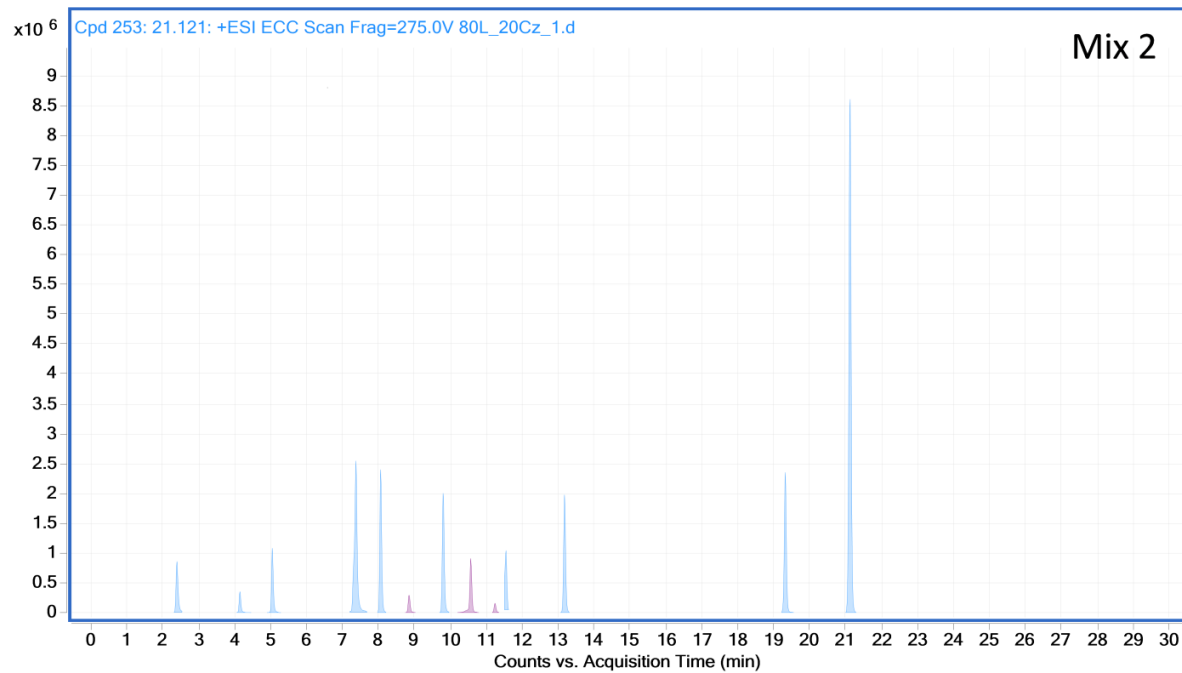

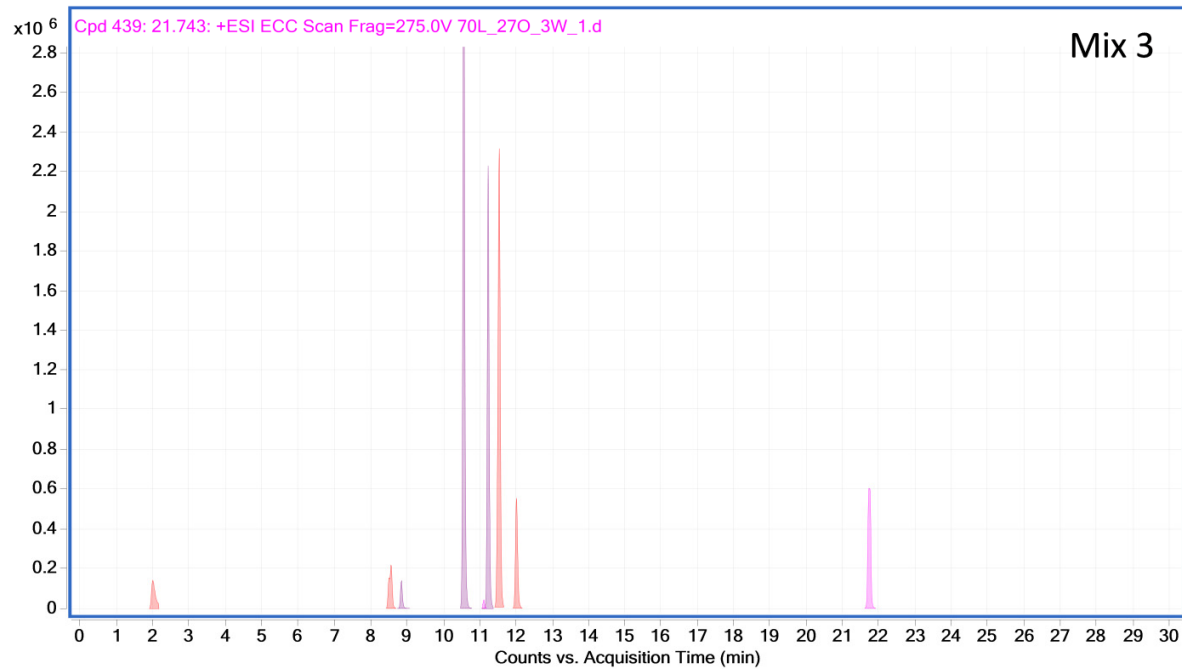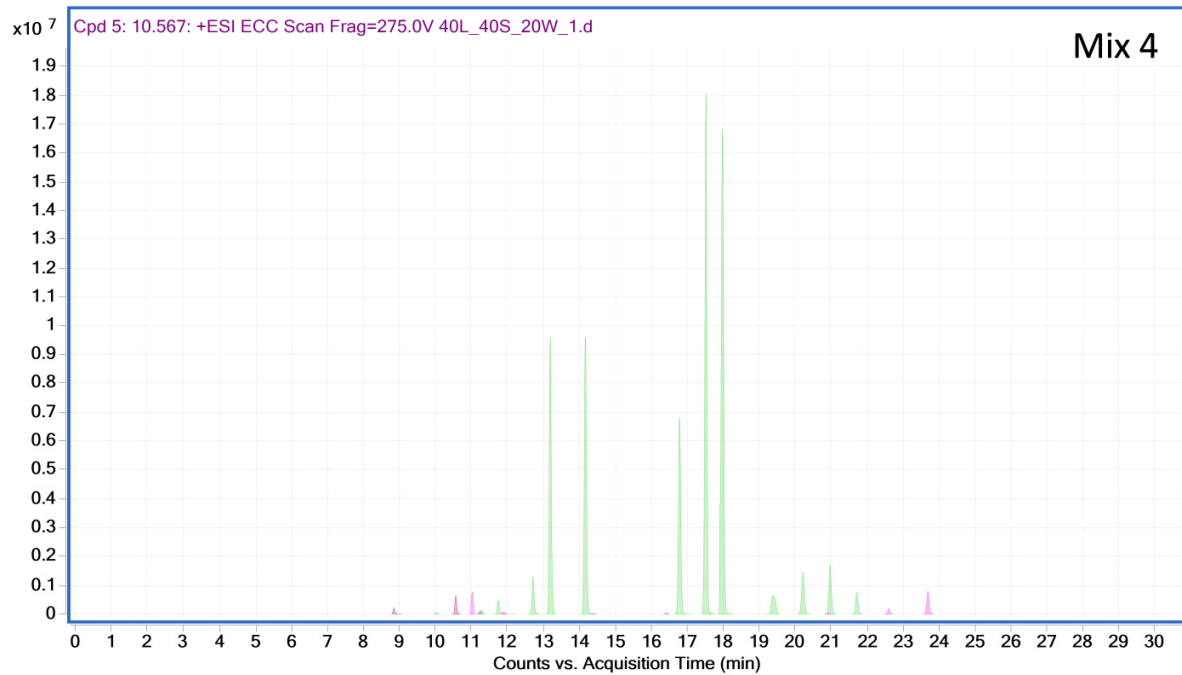

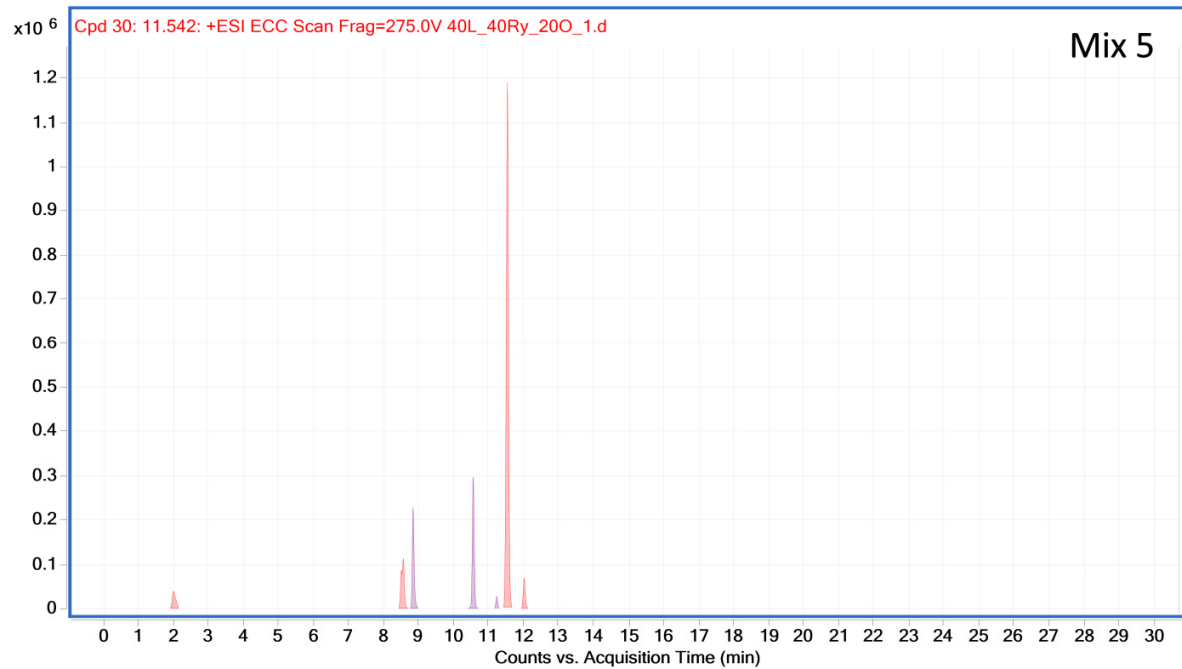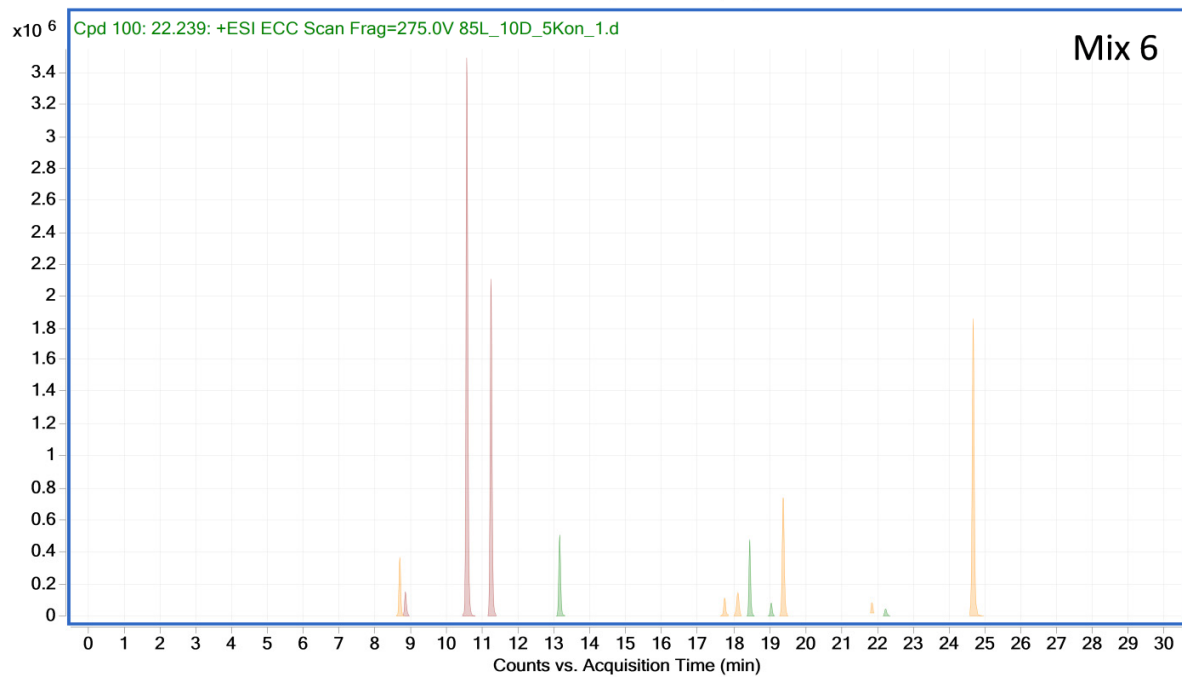

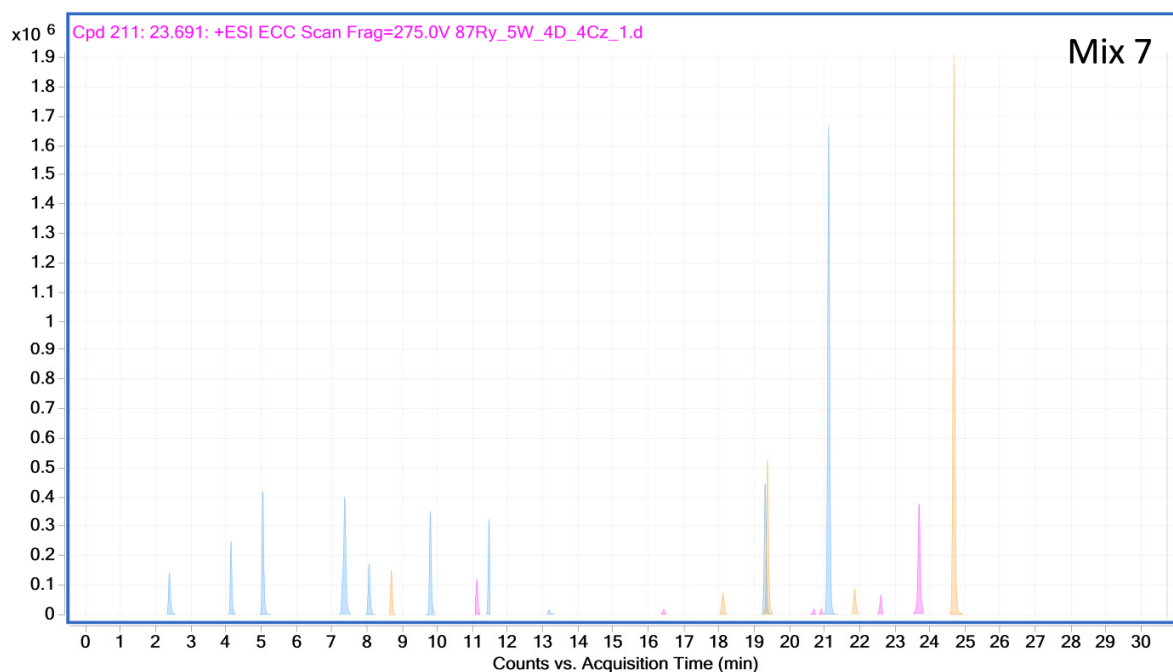

Figure S1. LC–QTOF extracted ion chromatograms of oil metabolite markers in 7 commercial unrefined, cold-pressed vegetable oils blends, of two-, three- and four-component (Mix 1- Mix 7). Flax seed oil markers - purple, milk thistle oil markers - red, evening primrose oil markers - pink, sunflower oil markers - light green, black seed oil markers- blue, pumpkin seed oil markers- orange, hemp oil markers- green. All details for oil specific markers are presented in Fig. S1 are given in Table 1 and Table S3
